# Supplementary figures and images for: Oral intake of Lactobacillus pentosus strain b240 accelerates salivary immunoglobulin A secretion in the elderly: A randomized, placebo-controlled, double-blind trial
Source: Springer Nature journal article supplement (doi:10.1186/1742-4933-7-11), 2010-08-26

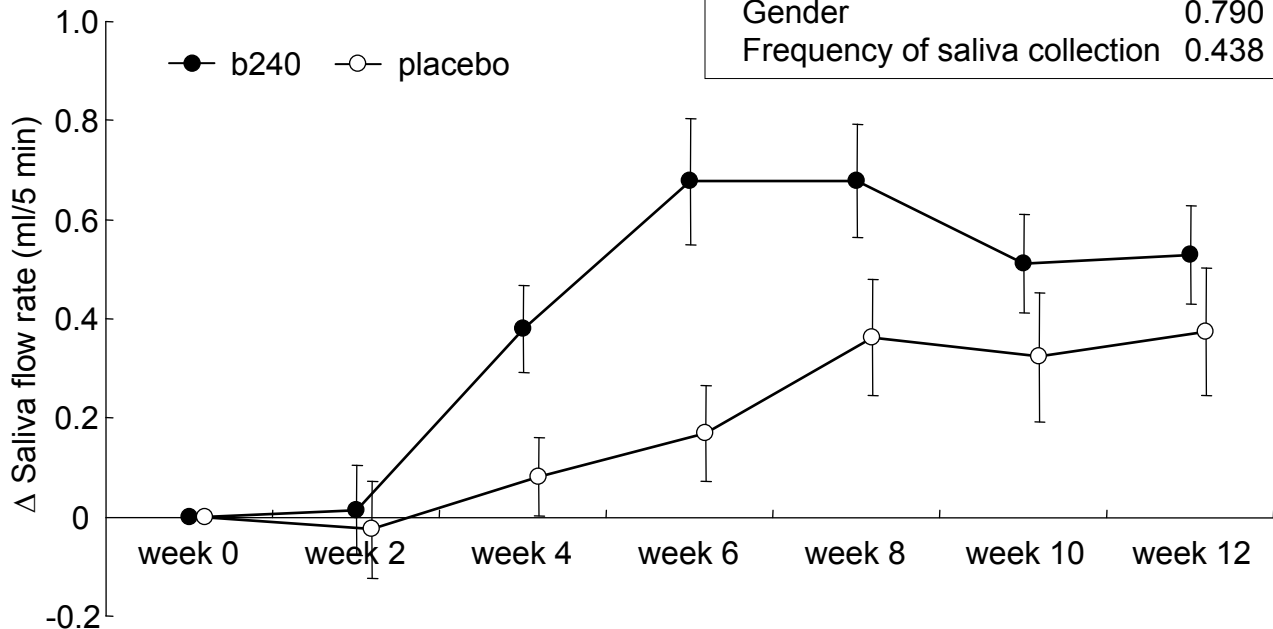

Supplement: 12979_2010_84_MOESM1_ESM.pdf [file 12979_2010_84_MOESM1_ESM.pdf]

| multiple-factor ANOVA:         | <i>P</i> value |
|--------------------------------|----------------|
| Group                          | <0.001         |
| Period of intake               | 0.003          |
| Gender                         | 0.161          |
| Frequency of saliva collection | 0.001          |

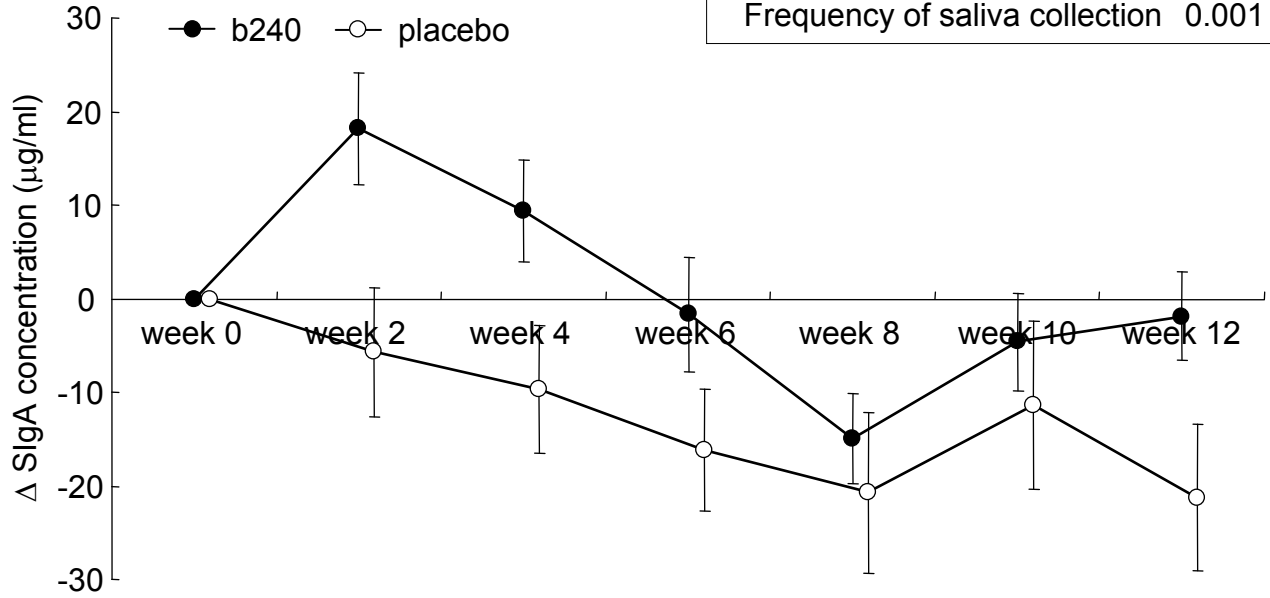

Supplement: 12979_2010_84_MOESM2_ESM.pdf [file 12979_2010_84_MOESM2_ESM.pdf]

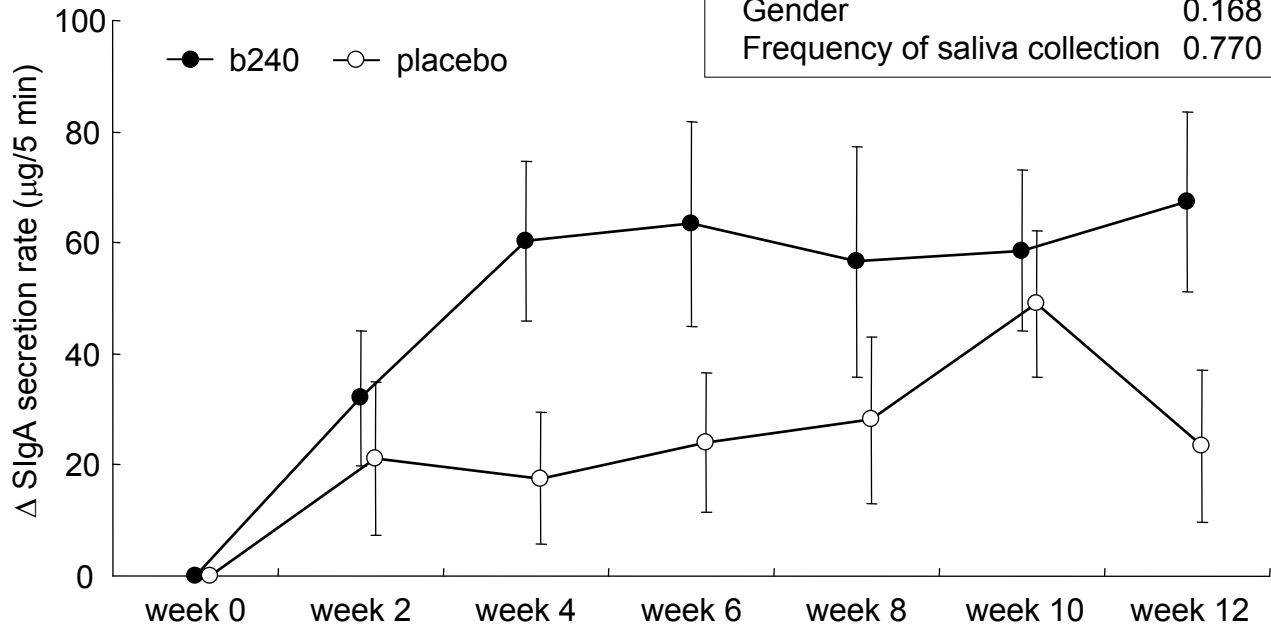

Supplement: 12979_2010_84_MOESM3_ESM.pdf [file 12979_2010_84_MOESM3_ESM.pdf]
